# Supplementary material for: Rhombohedral NASICON-structured Li2NaV2(PO4)3 with single voltage plateau for superior lithium storage
Source: Royal Society of Chemistry journal article supplement (doi:10.1039/c3ra44951c), 2013-11-27
Supplement: c3ra44951c.pdf [file c3ra44951c.pdf]

Electronic Supplementary material (ESI) for RSC Advances  
This journal is © The Royal Society of Chemistry 2013

## **Electronic Supplementary Information (ESI)**

### **Rhombohedral NASICON-Structured $\text{Li}_2\text{NaV}_2(\text{PO}_4)_3$ with Single Voltage Plateau for Superior Lithium Storage**

**Yi Zhang, Ping Nie, Laifa Shen, Guiyin Xu, Haifu Deng, Haifeng Luo, and  
Xiaogang Zhang\***

<sup>a</sup> College of Chemistry & Chemical Engineering, Xinjiang University, Urumqi  
830046, P. R. China.

<sup>b</sup> College of Material Science and Engineering and Key Laboratory for Intelligent  
Nano Materials and Devices of Ministry of Education, Nanjing University of  
Aeronautics and Astronautics, Nanjing, 210016, P. R. China.

\*Corresponding author, [azhangxg@163.com](mailto:azhangxg@163.com); Tel: +86-25-52112918; Fax:  
+86-25-52112626.

**Table S1.** Lattice parameters of the LNVP-1, LNVP-3 and LNVP-4.

| Compounds                                                                        | Structure Type | Lattice parameters |        |        |                     |
|----------------------------------------------------------------------------------|----------------|--------------------|--------|--------|---------------------|
|                                                                                  |                | a (Å)              | b (Å)  | c (Å)  | V (Å <sup>3</sup> ) |
| Na <sub>3</sub> V <sub>2</sub> (PO <sub>4</sub> ) <sub>3</sub> <sup>[29]</sup>   | Rhombohedral   | 8.7288             | 8.7288 | 21.804 | 1438.73             |
| Li <sub>2</sub> NaV <sub>2</sub> (PO <sub>4</sub> ) <sub>3</sub> <sup>[26]</sup> | Rhombohedral   | 8.325              | 8.325  | 22.491 | 1350                |
| <b>LNVP-1</b>                                                                    | Rhombohedral   | 8.326              | 8.326  | 22.577 | 1355.75             |
| <b>LNVP-3</b>                                                                    | Rhombohedral   | 8.333              | 8.333  | 22.516 | 1354.04             |
| <b>LNVP-4</b>                                                                    | Rhombohedral   | 8.337              | 8.337  | 22.584 | 1359.5              |

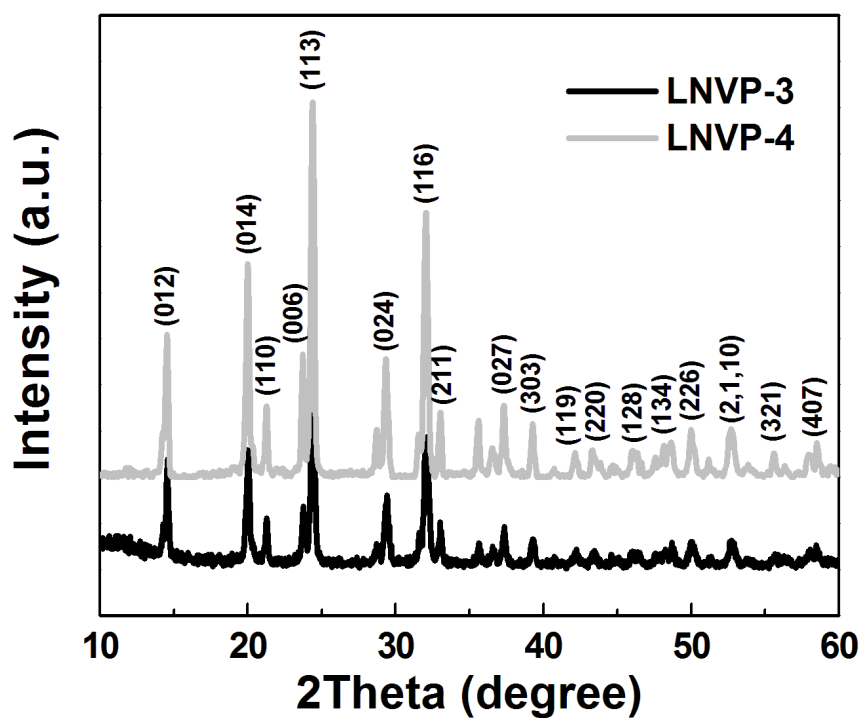

**Fig. S1.** XRD patterns of the LNVP-3 and LNVP-4 nanoparticles.

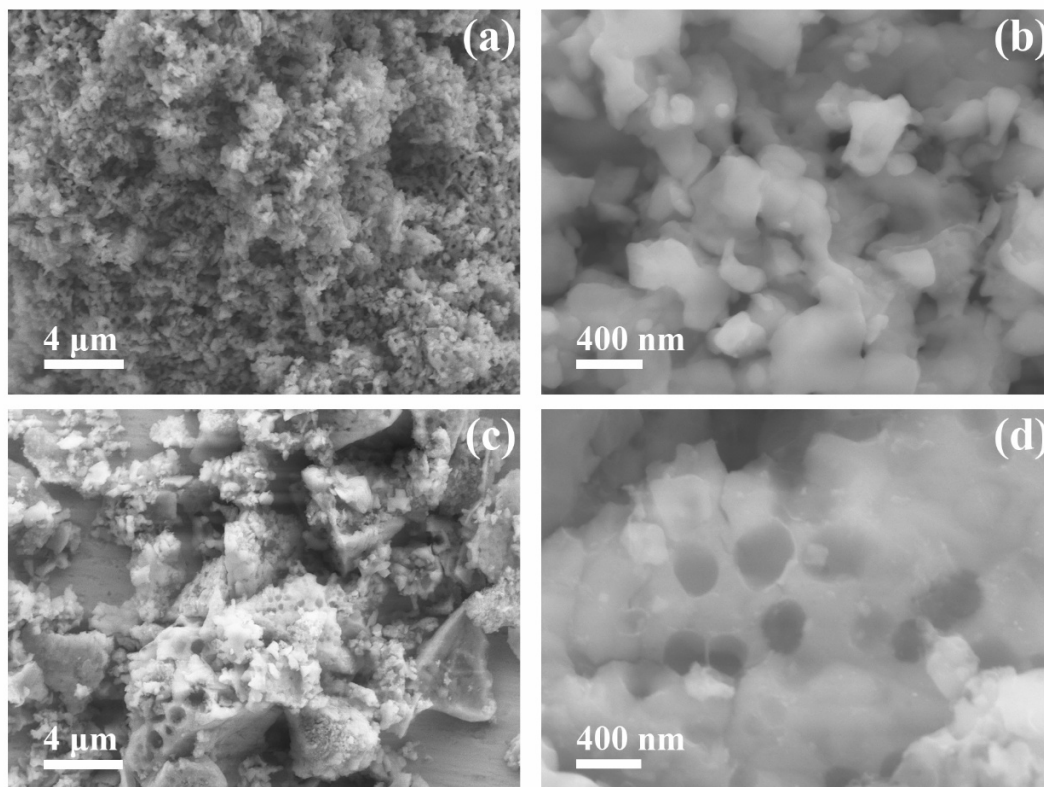

Fig. S2 Morphological analysis of LNVP-3 (a,b) and LNVP-4 (c,d).

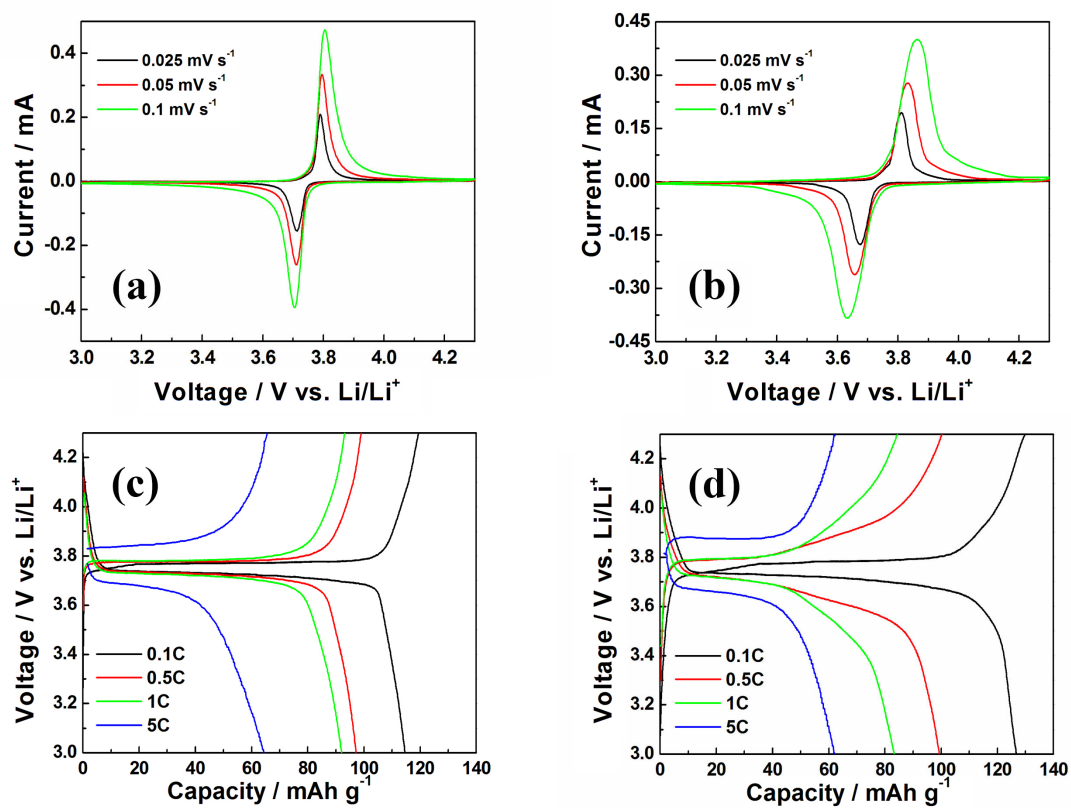

Fig. S3 Electrochemical properties of LNVP-3 and LNVP-4: CV and galvanostatic charge/discharge curves of LNVP-3 (a,c) and LNVP-4 (b,d).
